# Supplementary material for: Apoptotic exosome-like vesicles transfer specific and functional mRNAs to endothelial cells by phosphatidylserine-dependent macropinocytosis
Source: PubMed Central journal article supplement (PMC10359336; doi:10.1038/s41419-023-05991-x), 2023-07-20

# Original Immunoblots

Figure 8 and S7

**PCSK5**

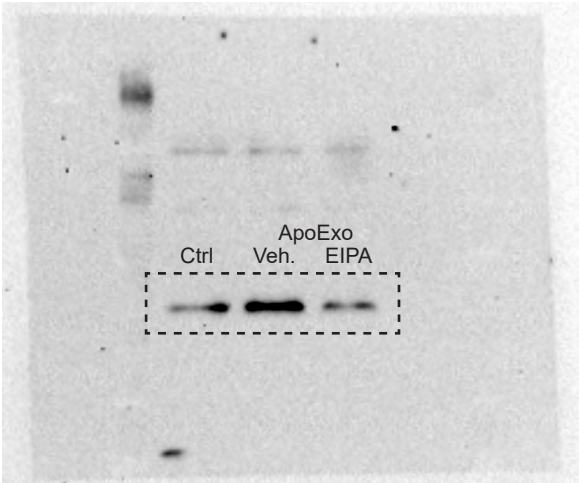

**GAPDH**

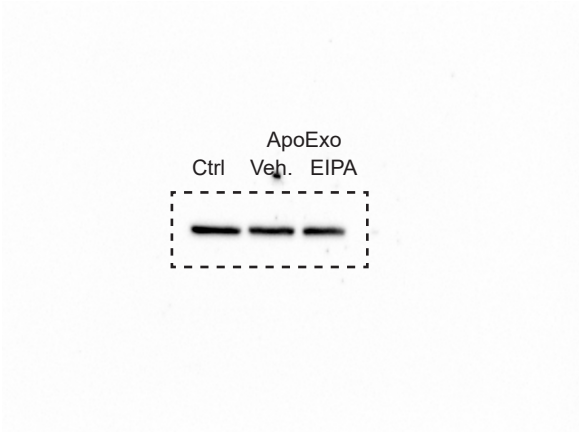

**PCSK5**

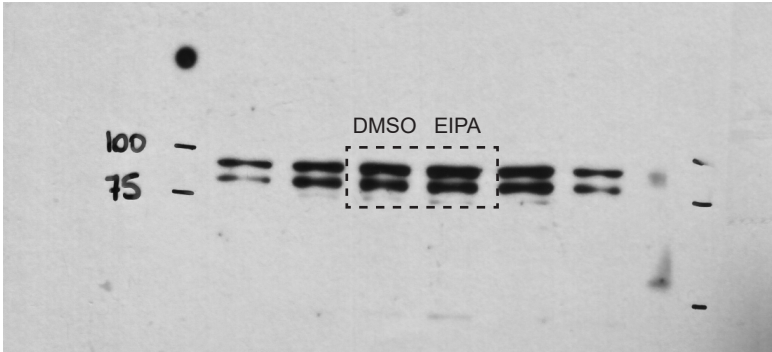

**PCSK5**

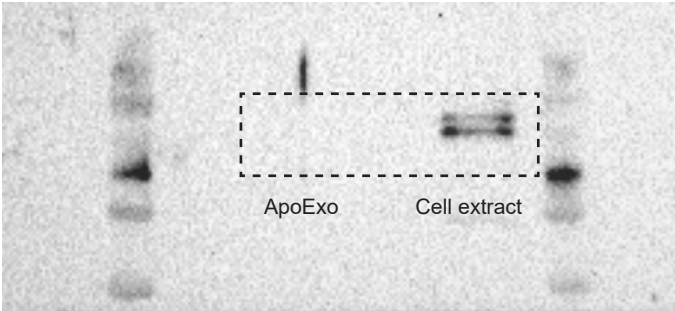

**GAPDH**

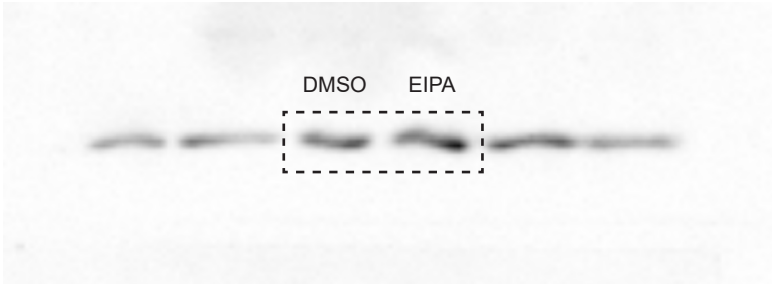

**20S Proteasome**

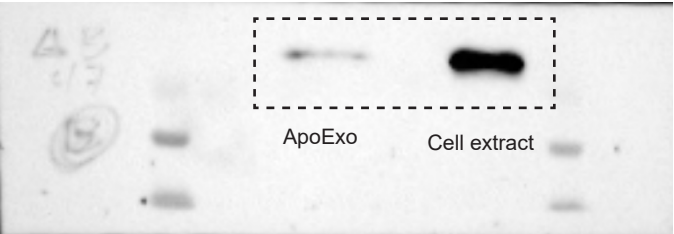

Supplement: 41419_2023_5991_MOESM11_ESM.pdf [file 41419_2023_5991_MOESM11_ESM.pdf]
